# Supplementary material for: Increased leukotoxin production: Characterization of 100 base pairs within the 530 base pair leukotoxin promoter region of Aggregatibacter actinomycetemcomitans
Source: PubMed Central journal article supplement (PMC5432517; doi:10.1038/s41598-017-01692-6), 2017-05-15
Supplement: 41598_2017_1692_MOESM1_ESM.pdf [file 41598_2017_1692_MOESM1_ESM.pdf]

**Increased leukotoxin production: Characterization of 100 base pairs within the 530 base pair leukotoxin promoter region of *Aggregatibacter actinomycetemcomitans***

Vandana Sampathkumar<sup>1+</sup>, Senthil Kumar Velusamy<sup>1+</sup>, Dipti Godbole<sup>1</sup>, Daniel H. Fine<sup>1\*</sup>

<sup>1</sup> Department of Oral Biology, Rutgers School of Dental Medicine, Newark, NJ 07103  
USA

<sup>+</sup> These authors contributed equally to this work

**\*Correspondence:**

**Daniel H. Fine**

185 South Orange Avenue

Medical Science Building Rm C-636

Newark New Jersey, 07103

Phone: 973-972-3728

FAX: 973-972-0045

Email: [finedh@sdm.rutgers.edu](mailto:finedh@sdm.rutgers.edu)

Supplementary Table. S1. Oligonucleotides used in this study

| Oligonucleotides                     | Sequence (5'→3')                                               |
|--------------------------------------|----------------------------------------------------------------|
| <b><i>ltxA</i> promoter deletion</b> |                                                                |
| 530USSUpF                            | ATACT <u>CCCGGGA</u> AGTGCGGTGATTCTTTCTTCTTGCGGTGATGAAG        |
| 530UpR                               | CTAAATAAAATAACCAAACCACAATATCCAGTATGCCATCATTA <sup>3</sup> AAAG |
| 530DnF                               | CTTTTAATGATGGCATACTGGATATTGTGGTTTGGTTATTTTATTTAG               |
| 530DnR                               | TACTAC <u>GAGCTCG</u> CAGGAGCAAATAAAGTTAAGCC                   |
| 400UpR                               | CTAAATAAAATAACCAAACCACAATAGTTGGTAAAATTAGATTTAAAATG             |
| 400DnF                               | CATTTTAAATCTAATTTTACCAACTATTGTGGTTTGGTTATTTTATTTAG             |
| 300UpR                               | CTAAATAAAATAACCAAACCACAATAGTCTGCGTAATAAGCAAGAGAAG              |
| 300DnF                               | CTTCTCTTGCTTATTACGCAGACTATTGTGGTTTGGTTATTTTATTTAG              |
| 200UpR                               | CTAAATAAAATAACCAAACCACAATAATTTTTAAAATTACAATGGAAAC              |
| 200DnF                               | GTTTCCATTGTAATTTTAAAAATTATTGTGGTTTGGTTATTTTATTTAG              |
| 100UpR                               | CTAAATAAAATAACCAAACCACAATATATTTAAGCTTTATTATTTTGC               |
| 100DnF                               | GCAAATAATAAAGCTTAAATATATTGTGGTTTGGTTATTTTATTTAG                |
| 80UpR                                | ATAAAATAACCAAACCACAATATTGTTAAACAACAAATAGAAATATAAC              |
| 80DnF                                | GTTATATTTCTATTTGTGTTTAAACAATATTGTGGTTTGGTTATTTTAT              |
| 530UpFI                              | GGGCCCAATTAATGGCGATTCTTTCTTCTTGCGGTGATGAAG                     |
| 530DnRI                              | TACTAGTTCGAATAACGCAGGAGCAAATAAAGTTAAGCC                        |
| -nagUpR                              | CTTATTTAACCTTATATTATAGGAATAATTTTTAAAATTACAATGGAAAC             |
| -nagDnF                              | GTTTCCATTGTAATTTTAAAAATTATTCCTATAATATAAGGTTAAATAAG             |
| <b><i>nagC</i> disruption</b>        |                                                                |

|                                     |                                              |
|-------------------------------------|----------------------------------------------|
| NAGC3R                              | TACTAGTTCGAATAACAGGCGGATATTGTGATCAGTTCC      |
| nagCDNFNew                          | CGCACTTTAAGGCTGTAAACGCTTTTTTCTCCCGAAAAGATAAG |
| 3619R                               | GGGCCCAATTAATGGCGAATGGTGCGGGACGAGGGACTTG     |
| nagCURNew                           | CTTATCTTTTCGGGAGAAAAAAGCGTTTACAGCCTTAAAGTGCG |
| <b><i>nagC</i> mutant screening</b> |                                              |
| NAGC4R                              | GAGGTGTTGGTGGAAAAGCTGG                       |
| 3843R                               | CCAATAAATTGTATAGTGGAAGC                      |
| <i>mlc</i> disruption               |                                              |
| mlcUF                               | GGGCCCAATTAATGGCCGTTCTTCACGTTGCGAACCGCC      |
| mlcUR                               | ATTGAGCTAAAACAAAGTTTAAATAATTCGGTATTTTTTA     |
| mlcDNF                              | TAAAAAATACGGAATTATTTAAACTTTGTTTTAGCTCAAT     |
| mlcDNR                              | TACTAGTTCGAATAACCTATGCTTTATACCAAGCTCAC       |
| <i>mlc</i> mutant screening         |                                              |
| mlc5'                               | CCGTGCCGTAACGACGCAAATCAC                     |
| mlc3'                               | GTCGGAGTCGGCATTATTCGAC                       |
| qRT-PCR & RT-PCR                    |                                              |
| orfXqF                              | CACTTTGTGAATACTGGCAACTT                      |
| orfXqR                              | GTGCCAATGATTTGTGCGAATA                       |
| orfXJnF                             | CGAGTATGTCCAGTACAGAATATGC                    |
| ltxAqF                              | GCGGCTCTACTTACTTGCA                          |
| ltxAqR                              | GCAATACCTAGGAAAGAC                           |
| ltxCqF                              | GGGCAAATTTAAGCCTTGAG                         |

ltxCqR

GCGCAATCCAATCAATAAAC

Sequences underlined are the restriction enzyme recognition sites

**Supplementary Figure. S1. The nucleotide sequence showing 530 bp ltxA promoter deletion and regulatory elements binding sites**

The *glyA* stop is shown as the stop codon for *glyA* gene. The Mlc binding site is highlighted in bold face. A -35 and -10 region preceding to *orfX* is highlighted. The start codon of *orfX* is ATG and is shown in bold face and the orfXJnF primer (in blue) binding site is highlighted. The 530 bp deletion starts from 1 to 530 and is shown in small letters. The *orfX* stop (tag) codon is shown in bold face. The encircled (red) bases are the proposed predicted stem loop structure. The probable NagC binding sites were also highlighted. The *ltxC* SD sequence and the start codon are highlighted in bold face.
